# Supplementary material for: Anaemia is associated with severe RBC dysfunction and a reduced circulating NO pool: vascular and cardiac eNOS are crucial for the adaptation to anaemia
Source: PubMed Central journal article supplement (PMC7293199; doi:10.1007/s00395-020-0799-x), 2020-06-12
Supplement: 395_2020_799_MOESM1_ESM.pdf [file 395_2020_799_MOESM1_ESM.pdf]

# **Anaemia is associated with severe RBC dysfunction and a reduced circulating NO pool: vascular and cardiac eNOS are crucial for the adaptation to anaemia**

**Running title:** *Wischmann et al.*; anaemia and myocardial infarction

## **Basic Research in Cardiology**

Patricia Wischmann\*, MD<sup>1,2,3</sup>, Viktoria Kuhn\*, MD<sup>1,2,3</sup>, Tatsiana Suvorava, PhD<sup>1,2,3</sup>, Johanna M. Muessig, MD<sup>1,2,3</sup>, Jens W. Fischer, PhD<sup>1,4</sup>, Brant E. Isakson, PhD<sup>5</sup>, Sebastian M. Haberkorn, MD<sup>1,2,6</sup>, Ulrich Flögel, PhD<sup>1,2,6</sup>, Jürgen Schrader, MD<sup>1,6</sup>, Christian Jung, MD<sup>1,2,3</sup>, Miriam M. Cortese-Krott, PhD<sup>1,2,3</sup>, Gerd Heusch, MD<sup>7</sup>, Malte Kelm, MD<sup>1,2,3</sup>

<sup>1</sup> CARID, Cardiovascular Research Institute Duesseldorf; <sup>2</sup> Division of Cardiology, Pulmonary Diseases and Vascular Medicine, University Hospital of Duesseldorf, Germany; <sup>3</sup> Cardiovascular Research Laboratory, Medical Faculty, Heinrich-Heine University, Duesseldorf, Germany; <sup>4</sup> Department of Pharmacology and Clinical Pharmacology, Heinrich-Heine University, Duesseldorf, Germany; <sup>5</sup> Department of Molecular Physiology and Biological Physics, Robert M. Berne Cardiovascular Research Centre, University of Virginia School of Medicine, Charlottesville, Virginia, USA; <sup>6</sup> Department of Molecular Cardiology, Heinrich Heine University, Duesseldorf, Germany; <sup>7</sup> Institute for Pathophysiology, West German Heart and Vascular Centre, University of Essen Medical School, Essen, Germany

## Supplemental material

| <b>Table of content</b>                                                           | <b>Pages</b> |
|-----------------------------------------------------------------------------------|--------------|
| <b>Supplemental tables</b>                                                        | <b>3</b>     |
| • Tab. 1: Haemodynamics in subacute anaemia at baseline and post AMI              | 3            |
| • Tab. 2: Haemodynamics in chronic anaemia at baseline and post AMI               | 4            |
| • Tab. 3: Circulating Nitric oxide (NO) metabolites in subacute anaemia           | 5            |
| • Tab. 4: Blood count in subacute (d3) anaemia                                    | 6            |
| • Tab. 5: Red blood cell (RBC) effects on left ventricular (LV) function          | 7            |
| • Tab. 6: Effects of NO on RBC function                                           | 10           |
| • Tab. 7: Patient Characteristics of human RBC Donors                             | 12           |
| • Tab. 8: Patient laboratory parameters of human RBC Donors                       | 14           |
| • Tab. 9: Effects of RBC from patients with ACS on left ventricular (LV) function | 15           |

## Supplemental Tables

**Table S1: Haemodynamics in subacute anaemia at baseline and post AMI**

| Circulatory<br>and cardiac function | Tab. 1A<br>Baseline |               |                           | Tab. 1B<br>post AMI |                   |                           |
|-------------------------------------|---------------------|---------------|---------------------------|---------------------|-------------------|---------------------------|
|                                     | sham                | anaemia       | <i>p-value</i><br>vs sham | sham                | anaemia           | <i>p-value</i> vs<br>sham |
| <b>Echocardiography analysis</b>    | <b>± SD</b>         | <b>± SD</b>   |                           | <b>± SD</b>         | <b>± SD</b>       |                           |
| Heart rate [BPM]                    | 420 ± 29            | 479 ± 14      | < 0.05                    | 531 ± 53 †          | 499 ± 25          |                           |
| Stroke volume [μL]                  | 33.8 ± 6.0          | 44.2 ± 6.7    | < 0.01                    | 32.3 ± 5.2          | 27.8 ± 2.1 ††††   |                           |
| Cardiac output [mL/min]             | 14.3 ± 3.1          | 20.00 ± 4.2   | < 0.01                    | 16.4 ± 1.5          | 13.9 ± 1.3 ††     |                           |
| End-diastolic volume [μL]           | 61.3 ± 7.1          | 71.5 ± 3.0    | < 0.01                    | 68.1 ± 8.9          | 66.2 ± 3.8        |                           |
| End-systolic volume [μL]            | 27.4 ± 3.8          | 27.3 ± 5.4    |                           | 36.0 ± 7.2 †        | 37.4 ± 5.8 ††     |                           |
| <b>Invasive catheterization</b>     | <b>± SD</b>         | <b>± SD</b>   |                           | <b>± SD</b>         | <b>± SD</b>       |                           |
| Systolic blood pressure [mmHg]      | 99.5 ± 11.6         | 83.8 ± 3.6    | < 0.05                    | 80.0 ± 4.7 †        | 72.8 ± 6.4        | < 0.05                    |
| Diastolic blood pressure [mmHg]     | 65.7 ± 12.7         | 55.6 ± 3.1    | < 0.05                    | 47.0 ± 5.4 †        | 44.3 ± 8.2 †      |                           |
| LV developed pressure [mmHg]        | 94.1 ± 3.8          | 90.6 ± 3.0    | < 0.05                    | 83.9 ± 2.7 ††††     | 80.6 ± 2.2 ††††   | < 0.05                    |
| dP/dt <sub>max</sub> [mmHg/s]       | 10778 ± 891.5       | 13649 ± 1127  | < 0.001                   | 9425 ± 952.8        | 9114 ± 814.8 †††† |                           |
| dP/dt <sub>min</sub> [mmHg/s]       | -8638 ± 355.3       | -8571 ± 714.9 |                           | -7316.6 ± 717.9 †   | -6840.0 ± 541 †   |                           |

Data are mean ± SD; echocardiography: n = 8-12 mice/group; pressure-volume-loop: n= 6 mice/group.  
 p < 0.05: † vs. baseline, p < 0.01: †† vs. baseline, p < 0.0001: †††† vs. baseline. BPM = beats per minute,  
 dP/dt<sub>max</sub> = maximum rate of pressure increase, dP/dt<sub>min</sub> = maximum rate of pressure decreases, LV = left  
 ventricular.

**Table S2: Haemodynamics in chronic anaemia at baseline and post AMI**

| Cardiac function parameter       | baseline      |       |               |       |                 |       |               |       | post 24h AMI        |      |                    |      |                                 |                |
|----------------------------------|---------------|-------|---------------|-------|-----------------|-------|---------------|-------|---------------------|------|--------------------|------|---------------------------------|----------------|
|                                  | sham          |       |               |       | chronic anaemia |       |               |       | sham                |      | chronic anaemia    |      | p-Value vs baseline, vs pre-AMI |                |
|                                  | Baseline (d0) | ± SD  | Pre-AMI (d42) | ± SD  | Baseline (d0)   | ± SD  | Pre-AMI (d42) | ± SD  | 24 h post AMI (d44) | ± SD | 24h post AMI (d44) | ± SD |                                 |                |
| <b>Heart rate [BPM]</b>          | 421           | ± 30  | 450           | ± 10  | 427             | ± 19  | 481           | ± 47  | < 0.05              | 521  | ± 30               | 510  | ± 40                            | < 0.05         |
| <b>Stroke Volume [µL]</b>        | 32.6          | ± 2.5 | 31.8          | ± 2.8 | 34.3            | ± 1.1 | 47.9          | ± 3.9 | < 0.05, < 0.05      | 26.3 | ± 1.4              | 22.8 | ± 3.4                           | < 0.05, < 0.05 |
| <b>Cardiac Output [mL/min]</b>   | 13.7          | ± 1.7 | 14.3          | ± 1.5 | 14.6            | ± 0.7 | 23.0          | ± 2.4 | < 0.05              | 13.7 | ± 1.1              | 11.7 | ± 2.2                           | < 0.05, < 0.05 |
| <b>End-diastolic volume [µL]</b> | 59.4          | ± 3.7 | 58.1          | ± 4.5 | 61.0            | ± 2.3 | 73.5          | ± 4.1 | < 0.05, < 0.05      | 62.2 | ± 3.6              | 62.7 | ± 5.8                           | < 0.05, < 0.05 |
| <b>End-systolic volume [µL]</b>  | 26.8          | ± 1.4 | 26.2          | ± 1.8 | 26.7            | ± 1.6 | 25.6          | ± 1.9 | < 0.05, < 0.05      | 35.9 | ± 2.3              | 39.9 | ± 4.9                           | < 0.05, < 0.05 |

Data are reported as mean ± SD of 9-10 mice/group. BPM = beats per minute.

**Table S3: Circulating NO metabolites in subacute anaemia**

| Metabolites                | Concentration | Wild type sham | Wild type anaemia | <i>p</i> -value vs. <i>Wild type sham</i> |
|----------------------------|---------------|----------------|-------------------|-------------------------------------------|
| <b><i>Erythrocytes</i></b> |               |                |                   |                                           |
| Nitrate                    | μM            | 10.10 ± 3.19   | 6.24 ± 3.18       |                                           |
| Nitrite                    | nM            | 193.6 ± 178.2  | 180.4 ± 58.65     |                                           |
| RXNO                       | nM            | 55.32 ± 58.38  | 85.51 ± 60.34     |                                           |
| NO haem                    | nM            | 11.88 ± 5.84   | 3.27 ± 2.67       | <0.01                                     |
| <b><i>Plasma</i></b>       |               |                |                   |                                           |
| Nitrate                    | μM            | 21.97 ± 15.96  | 12.41 ± 6.68      |                                           |
| Nitrite                    | nM            | 671.4 ± 274.4  | 547.0 ± 206.6     |                                           |
| RXNO                       | nM            | 7.71 ± 2.43    | 9.59 ± 4.06       |                                           |
| <b><i>Aorta</i></b>        |               |                |                   |                                           |
| Nitrite                    | μM            | 6.24 ± 1.24    | 22.06 ± 21.39     | p = 0.055                                 |
| Nitrate                    | μM            | 69.22 ± 70.62  | 24.94 ± 19.44     |                                           |
| RXNO                       | μM            | 41.46 ± 20.73  | 66.74 ± 30.79     | p = 0.082                                 |

Data are shown as means ± SD from 5-9 mice/group; RXNO = nitrosation products; NO-haem = nitrosyl haem.

**Table S4: Blood count in subacute (d3) anaemia**

| Blood count                       | d0 baseline |        | d3 subacute anaemia |         | <i>p-value vs</i> |
|-----------------------------------|-------------|--------|---------------------|---------|-------------------|
|                                   | mean        | ± SD   | mean                | ± SD    | <i>baseline</i>   |
| Haemoglobin [g/L]                 | 143.5       | ± 4.0  | 80.9                | ± 14.0  | < 0.05            |
| Haematocrit [proportion]          | 0.44        | ± 0.03 | 0.25                | ± 0.04  | < 0.05            |
| RBC count [ $10^{12}/L$ ]         | 8.9         | ± 0.3  | 4.9                 | ± 0.9   | < 0.05            |
| MCV [fL]                          | 49.8        | ± 0.4  | 51.8                | ± 1.3   | < 0.05            |
| MCH [pg]                          | 16.2        | ± 0.4  | 17.8                | ± 0.8   | < 0.05            |
| MCHC [g/dl]                       | 32.3        | ± 0.7  | 34.1                | ± 0.5   | < 0.05            |
| RDW [%]                           | 14.5        | ± 0.3  | 14.9                | ± 0.4   |                   |
| WBC count [ $10^9/L$ ]            | 6.9         | ± 1.3  | 4.7                 | ± 1.3   |                   |
| Lymphocytes [ $10^9/L$ ]          | 5.2         | ± 1.2  | 2.9                 | ± 1.1   |                   |
| Monocytes [ $10^9/L$ ]            | 0.2         | ± 0.1  | 0.2                 | ± 0.1   |                   |
| Granulocytes [ $10^9/L$ ]         | 1.5         | ± 0.3  | 1.3                 | ± 0.7   |                   |
| PLT count [ $10^9/L$ ]            | 1281.8      | ± 80.4 | 1686.8              | ± 136.2 |                   |
| LDH [U/L]                         | 103.5       | ± 47.0 | 243.8               | ± 81.7  | < 0.05            |
| Lactate (arterial) [mmol/L]       | 2.77        | ± 0.5  | 2.52                | ± 0.5   |                   |
| Lactate (venous) [mmol/L]         | 2.71        | ± 0.7  | 2.58                | ± 0.5   |                   |
| pH (arterial)                     | 7.38        | ± 0.01 | 7.42                | ± 0.02  |                   |
| pH (venous)                       | 7.37        | ± 0.04 | 7.37                | ± 0.03  |                   |
| pO <sub>2</sub> (arterial) [mmHg] | 99.41       | ± 3.9  | 94.2                | ± 4.7   |                   |
| pO <sub>2</sub> (venous) [mmHg]   | 54.37       | ± 7.0  | 47.46               | ± 3.7   |                   |
| SaO <sub>2</sub> (arterial) [%]   | 96.7        | ± 3.1  | 97.14               | ± 2.3   |                   |
| SaO <sub>2</sub> (venous) [%]     | 63.43       | ± 10.9 | 54.9                | ± 5.4   |                   |

Data are means ± SD from n = 5-13 mice/group; d = day; MCH = mean corpuscular haemoglobin; MCHC = mean corpuscular haemoglobin concentration; MCV = mean corpuscular volume; PLT = platelet; RBC = red blood cell; RDW = red blood cell distribution width; WBC = white blood cell; LDH = Lactate dehydrogenase; pO<sub>2</sub> = partial oxygen pressure; SO<sub>2</sub> = oxygen saturation.

**Table S5: Effects of whole blood (A) saline buffer (B), and RBC (C) on left ventricular (LV) function in isolated recipient hearts with ischaemia/reperfusion**

**TableS5A**

| Condition       | Whole blood                       |        |         |         |         | <i>p-value</i> |                     | <i>p-value</i> |          |
|-----------------|-----------------------------------|--------|---------|---------|---------|----------------|---------------------|----------------|----------|
|                 |                                   | sham   | ± SD    | anaemia | ± SD    | vs sham        | eNOS <sup>-/-</sup> | ± SD           | vs sham  |
|                 | Coronary flow [mL/min/g]          | 2.94   | ± 0.60  | 2.35    | ± 0.47  |                | 3.05                | ± 0.50         |          |
|                 | LV developed pressure [mmHg]      | 84.36  | ± 14.71 | 80.60   | ± 10.80 |                | 80.75               | ± 6.27         |          |
|                 | dP/dt <sub>max</sub> [mmHg/s]     | 3697   | ± 673.3 | 3212    | ± 532.0 |                | 3433                | ± 418.1        |          |
| <b>Baseline</b> | dP/dt <sub>min</sub> [mmHg/s]     | -2825  | ± 501.2 | -2279   | ± 420.5 | < 0.05         | -2367               | ± 350.2        |          |
|                 | Coronary flow [mL/min/g]          | 1.91   | ± 0.71  | 1.69    | ± 0.64  |                | 1.69                | ± 0.59         |          |
|                 | LV developed pressure [mmHg]      | 38.64  | ± 12.36 | 24.90   | ± 5.26  | < 0.01         | 18.75               | ± 7.44         | < 0.001  |
| <b>60 min</b>   | dP/dt <sub>max</sub> [mmHg/s]     | 1915   | ± 596.0 | 1099    | ± 249.9 | < 0.001        | 808.9               | ± 409.0        | < 0.0001 |
| <b>Recovery</b> | dP/dt <sub>min</sub> [mmHg/s]     | -966.7 | ± 366.1 | -695.5  | ± 136.0 | < 0.05         | -498.6              | ± 206.3        | < 0.01   |
|                 | Coronary flow [% Recovery]        | 64.82  | ± 18.55 | 71.50   | ± 21.00 |                | 56.00               | ± 18.03        |          |
|                 | LV developed pressure             |        |         |         |         |                |                     |                |          |
|                 | [% Recovery]                      | 46.91  | ± 16.84 | 31.70   | ± 9.25  | < 0.05         | 23.50               | ± 9.55         | < 0.01   |
| <b>%</b>        | dP/dt <sub>max</sub> [% Recovery] | 53.82  | ± 19.77 | 35.00   | ± 9.60  | < 0.05         | 24.00               | ± 12.24        | < 0.001  |
| <b>Recovery</b> | dP/dt <sub>min</sub> [% Recovery] | 34.64  | ± 13.67 | 32.70   | ± 11.37 |                | 21.13               | ± 8.44         | < 0.05   |

**Table S5B**

| <b>Condition</b> | <b>Buffer</b>                         | <b>buffer</b>  |             | <b>RBC of</b> |             | <b>p-value</b>   | <b>RBC of</b>  |             | <b>p-value</b>   |
|------------------|---------------------------------------|----------------|-------------|---------------|-------------|------------------|----------------|-------------|------------------|
|                  |                                       | <b>control</b> | <b>± SD</b> | <b>sham</b>   | <b>± SD</b> | <b>vs buffer</b> | <b>anaemia</b> | <b>± SD</b> | <b>vs buffer</b> |
| <b>Baseline</b>  | Coronary flow [mL/min/g]              | 3.07           | ± 0.66      | 2.00          | ± 0.45      |                  | 2.71           | ± 0.90      |                  |
|                  | LV developed pressure [mmHg]          | 90.20          | ± 13.07     | 77.71         | ± 14.81     |                  | 84.13          | ± 15.65     |                  |
|                  | dP/dt <sub>max</sub> [mmHg/s]         | 3752           | ± 426.8     | 3254          | ± 563.3     |                  | 3381           | ± 647.2     |                  |
|                  | dP/dt <sub>min</sub> [mmHg/s]         | !              | ± 491.2     | -2445         | ± 685.3     |                  | -2681          | ± 564.5     |                  |
| <b>60 min</b>    | Coronary flow [mL/min/g]              | 2.00           | ± 0.66      | 1.89          | ± 0.80      |                  | 2.05           | ± 0.74      |                  |
| <b>Recovery</b>  | LV developed pressure [mmHg]          | 28.80          | ± 20.84     | 44.71         | ± 13.92     |                  | 37.25          | ± 11.59     |                  |
|                  | dP/dt <sub>max</sub> [mmHg/s]         | 1318           | ± 1094      | 2072          | ± 699.9     |                  | 1714           | ± 606.6     |                  |
|                  | dP/dt <sub>min</sub> [mmHg/s]         | -862.6         | ± 673.9     | -1321         | ± 457.1     |                  | 1045           | ± 357.9     |                  |
| <b>%</b>         | Coronary flow [% Recovery]            | 63.80          | ± 8.8       | 91.74         | ± 26.98     |                  | 78.63          | ± 24.04     |                  |
| <b>Recovery</b>  | LV developed pressure<br>[% Recovery] | 30.20          | ± 18.73     | 58.00         | ± 14.07     | < 0.05           | 44.88          | ± 12.82     |                  |
|                  | dP/dt <sub>max</sub> [% Recovery]     | 33.20          | ± 24.55     | 63.86         | ± 17.06     | < 0.05           | 51.38          | ± 17.04     |                  |
|                  | dP/dt <sub>min</sub> [% Recovery]     | 28.20          | ± 19.11     | 55.14         | ± 14.21     | < 0.05           | 39.38          | ± 12.06     |                  |
|                  |                                       |                |             |               |             |                  |                |             |                  |



**Table S5C**

| Condition       | RBC Suspension                    |        |         |         |         | <i>p-value vs</i> |                     | <i>p-value vs</i> |        |
|-----------------|-----------------------------------|--------|---------|---------|---------|-------------------|---------------------|-------------------|--------|
|                 |                                   | sham   | ± SD    | anaemia | ± SD    | sham              | eNOS <sup>-/-</sup> | ± SD              | sham   |
| <b>Baseline</b> | Coronary flow [mL/min/g]          | 2.94   | ± 0.73  | 2.31    | ± 0.67  |                   | 3.38                | ± 0.52            |        |
|                 | LV developed pressure [mmHg]      | 75.43  | ± 10.83 | 79.00   | ± 12.41 |                   | 73.17               | ± 4.83            |        |
|                 | dP/dt <sub>max</sub> [mmHg/s]     | 3007   | ± 504.9 | 3616    | ± 548.9 | < 0.05            | 3333                | ± 282.3           |        |
|                 | dP/dt <sub>min</sub> [mmHg/s]     | -2286  | ± 364.5 | -2494   | ± 467.9 |                   | -2150               | ± 204.2           |        |
| <b>60 min</b>   | Coronary flow [mL/min/g]          | 1.78   | ± 0.60  | 1.59    | ± 0.62  |                   | 2.76                | ± 1.05            |        |
| <b>Recovery</b> | LV developed pressure [mmHg]      | 31.43  | ± 7.68  | 19.71   | ± 6.40  | < 0.01            | 23.66               | ± 4.98            |        |
|                 | dP/dt <sub>max</sub> [mmHg/s]     | 1291   | ± 462.1 | 892.1   | ± 379.3 |                   | 773.3               | ± 183.9           | < 0.05 |
|                 | dP/dt <sub>min</sub> [mmHg/s]     | -806.7 | ± 241.0 | -556.3  | ± 204.7 | < 0.05            | -453.5              | ± 70.07           | < 0.01 |
| <b>%</b>        | Coronary flow [% Recovery]        | 61.00  | ± 13.77 | 68.14   | ± 19.22 |                   | 79.17               | ± 20.16           |        |
| <b>Recovery</b> | LV developed pressure             |        |         |         |         |                   |                     |                   |        |
|                 | [% Recovery]                      | 42.43  | ± 11.76 | 25.14   | ± 7.47  | < 0.01            | 23.50               | ± 4.85            | < 0.01 |
|                 | dP/dt <sub>max</sub> [% Recovery] | 44.00  | ± 16.82 | 24.43   | ± 9.33  | < 0.05            | 23.67               | ± 6.74            | < 0.05 |
|                 | dP/dt <sub>min</sub> [% Recovery] | 35.71  | ± 10.70 | 22.71   | ± 7.68  | < 0.05            | 21.50               | ± 4.55            | < 0.05 |

In each table data are given for coronary flow and LV function at baseline, 60 min after recovery and recovery (%) in isolated hearts from healthy wild type mice loaded with **(A)** whole blood, **(B)** either saline buffer or a separate group of RBC pellet from sham and anaemic mice or **(C)** RBC suspension at the beginning of global myocardial ischaemia. Samples of whole blood or RBC were drawn from sham, anaemic WT mice or eNOS<sup>-/-</sup> mice. Data are means ± SD from n= 5-11 mice/group; **(A)** (n= 11 sham; n=10 anaemia; n= 8 eNOS<sup>-/-</sup>, whole blood); **(B)** ( n= 5 buffer; n= 7 sham; n=8 anaemia; RBC); **(C)** (n= 7 sham; n=7 anaemia; n= 6 eNOS<sup>-/-</sup>; RBC); dP/dt<sub>max</sub> = maximum rate of pressure increase; dP/dt<sub>min</sub> = maximum rate of pressure decrease; LV = left ventricular.

**Table S6: Effects of RBC pre-treated with NOS Inhibitor L-NAME or NO donor NONOate on left ventricular (LV) function in isolated recipient hearts with ischaemia/reperfusion**

Table S6A

| Condition         | RBC Suspension                     | sham+  |         | <i>p-value</i> | anaemia+ |         | <i>p-value</i>          |
|-------------------|------------------------------------|--------|---------|----------------|----------|---------|-------------------------|
|                   |                                    | L-NAME | ± SD    | <i>vs sham</i> | L-NAME   | ± SD    | <i>vs acute anaemia</i> |
| <b>Baseline</b>   | Coronary flow [mL/min/g]           | 2.40   | ± 0.51  |                | 2.11     | ± 0.26  |                         |
|                   | LV developed pressure [mmHg]       | 80.00  | ± 15.38 |                | 82.17    | ± 13.45 |                         |
|                   | dP/dt <sub>max</sub> [mmHg/s]      | 3709   | ± 684.9 |                | 3523     | ± 491.1 |                         |
|                   | dP/dt <sub>min</sub> [mmHg/s]      | -2651  | ± 598.9 |                | -2567    | ± 531.5 |                         |
| <b>60 min</b>     | Coronary flow [% Recovery]         | 1.95   | ± 0.26  |                | 2.42     | ± 0.50  | < 0.05                  |
| <b>Recovery</b>   | LV developed pressure [% Recovery] | 46.67  | ± 17.88 |                | 37.17    | ± 16.13 | < 0.05                  |
|                   | dP/dt <sub>max</sub> [% Recovery]  | 2223   | ± 1036  |                | 1674     | ± 780.7 | < 0.05                  |
|                   | dP/dt <sub>min</sub> [% Recovery]  | -1307  | ± 552.6 |                | -1026    | ± 441.3 | < 0.05                  |
| <b>% Recovery</b> | Coronary flow [% Recovery]         | 83.33  | ± 16.65 |                | 99.50    | ± 3.41  | < 0.01                  |
|                   | LV developed pressure [% Recovery] | 55.67  | ± 22.11 |                | 44.50    | ± 18.73 | < 0.05                  |
|                   | dP/dt <sub>max</sub> [% Recovery]  | 60.00  | ± 24.58 |                | 47.00    | ± 21.00 | < 0.05                  |
|                   | dP/dt <sub>min</sub> [% Recovery]  | 50.83  | ± 23.76 |                | 40.00    | ± 16.28 | < 0.05                  |

**Tab. 6B**

| Condition         | RBC Suspension                     | sham     |         | <i>p-value</i> | anaemia  |         | <i>p-value</i>   |
|-------------------|------------------------------------|----------|---------|----------------|----------|---------|------------------|
|                   |                                    | +NONOate | ± SD    | vs sham        | +NONOate | ± SD    | vs acute anaemia |
| <b>Baseline</b>   | Coronary flow [mL/min/g]           | 1.88     | ± 0.58  | < 0.05         | 2.36     | ± 0.71  |                  |
|                   | LV developed pressure [mmHg]       | 78.17    | ± 10.98 |                | 86.86    | ± 9.06  |                  |
|                   | dP/dt <sub>max</sub> [mmHg/s]      | 3098     | ± 384.4 |                | 3585     | ± 459.2 |                  |
|                   | dP/dt <sub>min</sub> [mmHg/s]      | -2296    | ± 347.7 |                | -2660    | ± 343.9 |                  |
| <b>60 min</b>     | Coronary flow [% Recovery]         | 1.62     | ± 0.51  |                | 2.11     | ± 0.74  |                  |
| <b>Recovery</b>   | LV developed pressure [% Recovery] | 29.33    | ± 3.33  |                | 31.00    | ± 8.04  | < 0.05           |
|                   | dP/dt <sub>max</sub> [% Recovery]  | 1204     | ± 195.7 |                | 1296     | ± 382.6 |                  |
|                   | dP/dt <sub>min</sub> [% Recovery]  | -755.2   | ± 107.4 |                | -896.3   | ± 382.1 |                  |
| <b>% Recovery</b> | Coronary flow [% Recovery]         | 86.33    | ±9.40   | < 0.01         | 89.14    | ± 8.14  | < 0.05           |
|                   | LV developed pressure [% Recovery] | 38.50    | ± 8.87  |                | 36.41    | ± 10.37 | < 0.05           |
|                   | dP/dt <sub>max</sub> [% Recovery]  | 40.17    | ± 10.80 |                | 36.29    | ± 9.53  | < 0.05           |
|                   | dP/dt <sub>min</sub> [% Recovery]  | 34.00    | ± 9.72  |                | 31.71    | ± 10.29 |                  |

Data are given for coronary flow and LV function at baseline, 60 minutes after recovery and post-ischaemic recovery (%) in isolated hearts from healthy wild type mice loaded with sham or anaemic RBC suspension which was preincubated with (A) L-NAME or (B) NONOate at the beginning of global myocardial ischaemia. Data are means ± SD from n= 5-7 mice/group; (A) (n= 5 sham, n= 6 anaemia ); (B) (n= 6 sham; n= 7 anaemia); p-value: Table S5C vs. sham and vs. anaemia. dP/dt<sub>max</sub> = maximum rate of pressure increase; dP/dt<sub>min</sub>= maximum rate of pressure decreases; LV= left ventricular.

**Table S7: Presenting characteristics of patients with ACS**

| Characteristics                   | Patients<br>(all<br>(n=29) |         | ACS<br>without<br>anaemia<br>(n=14) |         | ACS<br>with<br>anaemia<br>(n=15) |         | <i>p-value</i> |
|-----------------------------------|----------------------------|---------|-------------------------------------|---------|----------------------------------|---------|----------------|
| <b>Demographics</b>               |                            |         |                                     |         |                                  |         |                |
| Age (years)                       | 69                         | ± 12    | 65                                  | ± 11    | 73                               | ± 12    |                |
| Sex (male, %)                     | 16                         | (55%)   | 8                                   | (53.7%) | 8                                | (53%)   |                |
| <b>Medical history</b>            |                            |         |                                     |         |                                  |         |                |
| Hypertension (n, %)               | 23                         | (79%)   | 11                                  | (79%)   | 12                               | (80%)   |                |
| Hyperlipidemia (n, %)             | 15                         | (52%)   | 9                                   | (64%)   | 6                                | (40%)   |                |
| Diabetes mellitus (n, %)          | 8                          | (29%)   | 3                                   | (21%)   | 5                                | (33%)   |                |
| Current smoker (n, %)             | 14                         | (48%)   | 5                                   | (36%)   | 9                                | (60%)   |                |
| PAD (n, %)                        | 7                          | (24%)   | 3                                   | (21%)   | 4                                | (27%)   |                |
| Stroke (n, %)                     | 1                          | (3%)    | 1                                   | (7%)    | 0                                | (0%)    |                |
| Chronic kidney disease (n, %)     |                            |         |                                     |         |                                  |         |                |
| CKD I-II (n, %)                   | 16                         | (55%)   | 11                                  | (79%)   | 5                                | (33%)   |                |
| CKD >III (n, %)                   | 13                         | (45%)   | 3                                   | (21%)   | 10                               | (67%)   |                |
| <b>Presenting characteristics</b> |                            |         |                                     |         |                                  |         |                |
| BMI                               | 27.7                       | ± 6.4   | 30.3                                | ± 8.1   | 25.2                             | ± 2.9   | < 0.05         |
| HR [bpm]                          | 77                         | ± 19    | 76                                  | ± 11    | 78                               | ± 25    |                |
| Systolic BP                       | 137                        | ± 24    | 132                                 | ± 23    | 141                              | ± 26    |                |
| Diastolic BP                      | 74                         | ± 11    | 74                                  | ± 13    | 74                               | ± 10    |                |
| <b>Procedural characteristics</b> |                            |         |                                     |         |                                  |         |                |
| Primary PCI (n, %)                | 12                         | (41%)   | 5                                   | (36%)   | 7                                | (47%)   |                |
| Microangiopathy (n, %)            | 4                          | (14%)   | 3                                   | (21%)   | 1                                | (7%)    |                |
| 1 vessel CAD (n, %)               | 3                          | (10%)   | 0                                   | (0%)    | 3                                | (20%)   |                |
| 2 vessel CAD (n, %)               | 1                          | (3%)    | 1                                   | (7%)    | 0                                | (0%)    |                |
| 3 vessel CAD (n, %)               | 21                         | (72%)   | 10                                  | (71%)   | 11                               | (73%)   |                |
| EF (%)                            | 29                         | 49 ± 15 | 14                                  | 54 ± 14 | 15                               | 44 ± 15 | < 0.05         |
| STEMI (n, %)                      | 10                         | (34%)   | 6                                   | (43%)   | 4                                | (27%)   |                |
| NSTEMI (n, %)                     | 19                         | (66%)   | 8                                   | (57%)   | 11                               | (73%)   |                |
| <b>Medications</b>                |                            |         |                                     |         |                                  |         |                |
| Aspirin                           | 24                         | (83%)   | 12                                  | (86%)   | 12                               | (80%)   |                |
| ACEI/ARB                          | 27                         | (93%)   | 14                                  | (100%)  | 13                               | (87%)   |                |
| β-Blocker                         | 25                         | (86%)   | 12                                  | (86%)   | 13                               | (87%)   |                |
| Lipid Lowering                    | 23                         | (79%)   | 11                                  | (79%)   | 12                               | (80%)   |                |
| P2Y12-Inhibitor                   | 22                         | (76%)   | 11                                  | (79%)   | 11                               | (73%)   |                |
| N(OAK)                            | 8                          | (28%)   | 2                                   | (14%)   | 6                                | (40%)   |                |

Values are mean ± SD or are given as absolute values in %. ACS= acute coronary syndrome;

PAD= peripheral arterial disease; CKD= chronic kidney disease; BMI= Body mass index; HR= heart rate; BP= blood pressure; PCI= percutaneous coronary intervention; CAD= coronary artery disease; EF= ejection fraction; STEMI= ST-elevation myocardial infarction; NSTEMI=

non ST-elevation myocardial infarction; ACEI= Angiotensin-converting-enzyme-inhibitor;  
ARB=Angiotensin-receptor-blocker; N(OAK)=(non) vitamin K antagonist oral anticoagulants.

**Table S8: Laboratory parameters of patients with ACS on admission**

| Laboratory chemical<br>Parameters | [References]          | Patients (all)<br>(n=29) |         | ACS without<br>anaemia (n=14) |         | ACS with<br>anaemia (n=15) |         | <i>p-value</i> |
|-----------------------------------|-----------------------|--------------------------|---------|-------------------------------|---------|----------------------------|---------|----------------|
| Creatinine [mg/dl]                | [<=1.20]              | 1.14                     | ± 0.57  | 0.87                          | ± 0.23  | 1.39                       | ± 0.68  | < 0.05         |
| GFR [mL/min]                      | [90-140]              | 69.79                    | ± 29.5  | 84.36                         | ± 20.19 | 56.20                      | ± 30.86 | < 0.01         |
| Haemoglobin [g/dl]                | [13.5-16.9]           | 11.83                    | ± 2.68  | 14.16                         | ± 1.31  | 9.66                       | ± 1.52  | < 0.01         |
| Haematocrit [%]                   | [40.0-49.4]           | 36.07                    | ± 7.32  | 41.99                         | ± 4.99  | 30.55                      | ± 4.05  | < 0.01         |
| MCV [fL]                          | [81.8-95.5]           | 93.29                    | ± 5.6   | 93.26                         | ± 4.32  | 93.31                      | ± 6.73  |                |
| MCH [pg]                          | [27.0-32.3]           | 30.03                    | ± 2.28  | 30.64                         | ± 1.28  | 29.47                      | ± 2.86  |                |
| MCHC [g Hb/dl]                    | [32.4-35.0]           | 32.16                    | ± 1.58  | 32.80                         | ± 0.84  | 31.55                      | ± 1.87  |                |
| Iron [µg/dl]                      | [40-120]              | 71.00                    | ± 38.76 | 90.79                         | ± 38.60 | 52.53                      | ± 29.40 | < 0.01         |
| Transferrin [mg/dl]               | [200-360]             | 257.5                    | ± 227.7 | 224.0                         | ± 29.50 | 288.8                      | ± 317.4 |                |
| Transferrin Saturation[%]         | [15-45]               | 25.45                    | ± 15.65 | 28.43                         | ± 10.88 | 22.67                      | ± 19.05 |                |
| Ferritin [µg/L]                   | [30.0-<br>400.0]      | 163.3                    | ± 103.5 | 165.3                         | ± 91.84 | 161.4                      | ± 116.6 |                |
| Vitamin B12 [pg/mL]               | [197-<br>771]         | 411.9                    | ± 281.6 | 334.9                         | ± 114.7 | 483.7                      | ± 367.3 |                |
| Folic acid [ng/mL]                | [3.9-<br>27.8]        | 8.08                     | ± 5.41  | 8.17                          | ± 4.21  | 7.99                       | ± 6.49  |                |
| sTFR [mg/L]                       | [0.81-<br>1.75]       | 1.38                     | ± 0.62  | 1.17                          | ± 0.27  | 1.57                       | ± 0.78  |                |
| Haptoglobin [mg/dl]               | [30-200]              | 131.4                    | ± 92.2  | 128.2                         | ± 54.59 | 134.3                      | ± 119.2 |                |
| LDH [U/L]                         | [<248]                | 392.2                    | ± 405.2 | 426.2                         | ± 468.0 | 360.5                      | ± 350.3 |                |
| Bilirubin [mg/dl]                 | [<1.00]               | 0.56                     | ± 0.26  | 0.59                          | ± 0.19  | 0.53                       | ± 0.32  |                |
| Reticulocytes (absolute)          | [23-70]<br>[x1000/µL] | 79.31                    | ± 24.56 | 77.43                         | ± 13.0  | 81.07                      | ± 32.27 |                |
| Ret-Hb [pg]                       | [28-35]               | 34.00                    | ± 3.67  | 36.19                         | ± 1.3   | 31.95                      | ± 4.01  | < 0.01         |
| CK [U/L]                          | [<171]                | 393.2                    | ± 585.1 | 347.1                         | ± 364.2 | 436.2                      | ± 746.6 |                |
| Troponin [ng/L]                   | [<14]                 | 1984                     | ± 6090  | 1580                          | ± 3845  | 2360                       | ± 7755  |                |
| NT-proBNP [pg/mL]                 | [<125]                | 2334                     | ± 2529  | 1200                          | ± 1589  | 3392                       | ± 2823  | <0.05          |

Values are mean ± SD. GFR= glomerular filtration rate; MCV= mean corpuscular volume; MCH= mean corpuscular haemoglobin; MCHC= mean corpuscular haemoglobin concentration; sTFR= soluble transferrin receptor; LDH= lactate dehydrogenase; Ret-Hb= reticulocytes-haemoglobin; CK= creatine kinase; NT-pro BNP= B type natriuretic peptide.

**Table S9: Effects of RBC from ACS patients on left ventricular (LV) function in isolated recipient hearts with ischaemia/reperfusion**

| RBC Suspension  |                                    | ACS                          |         | ACS                       |         | <i>p-value</i> |
|-----------------|------------------------------------|------------------------------|---------|---------------------------|---------|----------------|
|                 |                                    | without<br>anaemia<br>(n=14) | ± SD    | with<br>anaemia<br>(n=15) | ± SD    |                |
| Condition       |                                    |                              |         |                           |         |                |
| <b>Baseline</b> | Coronary flow [mL/min/g]           | 2.31                         | ± 0.39  | 2.21                      | ± 0.29  |                |
|                 | LV developed pressure [mmHg]       | 86.71                        | ± 10.90 | 90.20                     | ± 13.84 |                |
|                 | dP/dt <sub>max</sub> [mmHg/s]      | 3517                         | ± 422.3 | 3662                      | ± 598.4 |                |
|                 | dP/dt <sub>min</sub> [mmHg/s]      | -2706                        | ± 417.1 | -2838                     | ± 551.2 |                |
| <b>60 min</b>   | Coronary flow [% Recovery]         | 2.28                         | ± 0.31  | 1.73                      | ± 0.45  | < 0.001        |
| <b>Recovery</b> | LV developed pressure [% Recovery] | 29.29                        | ± 10.86 | 21.67                     | ± 8.32  | < 0.05         |
|                 | dP/dt <sub>max</sub> [% Recovery]  | 1191                         | ± 446.2 | 949.0                     | ± 372.7 |                |
|                 | dP/dt <sub>min</sub> [% Recovery]  | -765.4                       | ± 259.5 | -663.4                    | ± 231.5 |                |
| <b>%</b>        | Coronary flow [% Recovery]         | 100.1                        | ± 16.73 | 78.27                     | ± 22.88 | < 0.01         |
| <b>Recovery</b> | LV developed pressure [% Recovery] | 33.57                        | ± 11.26 | 24.27                     | ± 8.52  | < 0.05         |
|                 | dP/dt <sub>max</sub> [% Recovery]  | 33.86                        | ± 12.12 | 26.20                     | ± 9.83  |                |
|                 | dP/dt <sub>min</sub> [% Recovery]  | 28.50                        | ± 9.28  | 23.40                     | ± 6.61  |                |

Data are given for coronary flow and LV function at baseline, 60 minutes after recovery and post-ischaemic recovery (%) in isolated hearts from healthy wild type mice loaded with human RBC donors of anaemic and non-anaemic ACS patients at the beginning of global myocardial ischaemia. Data are means ± SD; (n= 14 non-anaemia, n=15 anaemia). dP/dt<sub>max</sub>= maximum rate of pressure increase; dP/dt<sub>min</sub> = maximum rate of pressure decrease; LV = left ventricular; ACS= acute coronary syndrome.
